# Supplementary material
Source: publisher site journal article supplement (https://www.dovepress.com/article/supplementary_file/617159/617159%20Supplementary%20Table_1.docx)
Supplement: Supplementary file 1 [file 617159%20Supplementary%20Table_1.docx]

**Supplementary Tables**

The multivariable Cox proportional hazards model demonstrated good prognostic performance for progression-free survival (PFS), with a concordance index (C-index) of 0.775. The overall model fit was statistically significant, as indicated by the likelihood ratio test (P < 0.001), Wald test (P < 0.001), and log-rank test (P < 0.001), suggesting strong discriminatory ability and overall model robustness.

In the final model, FIGO stage, histological type, NLR, and log-transformed CA125 remained independent predictors of PFS. Sensitivity analyses further supported the stability of the model after adjustment for adjuvant therapy, with consistent effect estimates observed across key prognostic variables.

Supplementary Table S1 Full multivariable Cox proportional hazards regression model for progression-free survival (including adjuvant therapy).

| **Variable** | **HR** | **95% CI** | **P value** |
| --- | --- | --- | --- |
| FIGO stage III–IV | 2.00 | 1.22–3.29 | 0.006 |
| Histology (Non-endometrioid) | 1.86 | 1.11–3.02 | 0.012 |
| LVSI (Positive) | 1.39 | 0.85–2.27 | 0.184 |
| Myometrial invasion ≥1/2 | 1.39 | 0.87–2.20 | 0.165 |
| NLR | 1.17 | 1.03–1.35 | 0.020 |
| PNI | 0.96 | 0.91–1.01 | 0.133 |
| log(CA125) | 1.67 | 1.12–2.48 | 0.012 |
| Adjuvant therapy (Chemotherapy) | 1.09 | 0.62–1.92 | 0.752 |
| Adjuvant therapy (None) | 0.35 | 0.16–0.77 | 0.009 |
| Adjuvant therapy (Radiotherapy) | 0.55 | 0.26–1.17 | 0.119 |
